# Supplementary material for: Hexahalorhenate(iv) salts of protonated ciprofloxacin: antibiotic-based single-ion magnets
Source: Royal Society of Chemistry journal article supplement (doi:10.1039/d1ce01337h), 2021-01-01
Supplement: d1ce01337h1.pdf [file d1ce01337h1.pdf]

# Hexahalorhenate(IV) Salts of Protonated Ciprofloxacin: Antibiotic-Based Single-Ion Magnets

Adrián Sanchis-Perucho,<sup>a</sup> Marta Orts-Arroyo,<sup>a</sup> Javier Camús-Hernández,<sup>a</sup> Carlos Rojas-Dotti,<sup>a</sup> Emilio Escrivà,<sup>b</sup> Francesc Lloret<sup>a</sup> and José Martínez-Lillo<sup>\*a</sup>

<sup>a</sup>Instituto de Ciencia Molecular (ICMol)/Departament de Química Inorgànica, Universitat de València, c/ Catedrático José Beltrán 2, 46980, Paterna, València, Spain.

<sup>b</sup>Departament de Química Inorgànica, Facultat de Química, Universitat de València, Av. Vicente Andrés Estellés s/n, 46100, Burjassot (València), Spain.

| Table of contents | page |
|-------------------|------|
| Figure S1.....    | 2    |
| Table S1.....     | 3    |
| Figure S2.....    | 4    |
| Figure S3.....    | 5    |
| Figure S4.....    | 5    |
| Figure S5.....    | 6    |
| Figure S6.....    | 6    |
| Figure S7.....    | 7    |
| Figure S8.....    | 7    |
| Figure S9.....    | 8    |
| Table S2.....     | 9    |
| Table S3.....     | 9    |
| Figure S10.....   | 10   |
| Figure S11.....   | 10   |

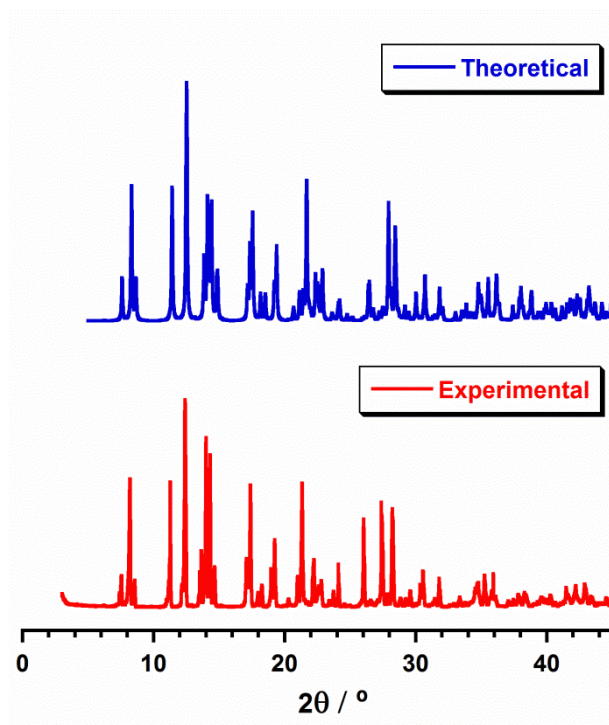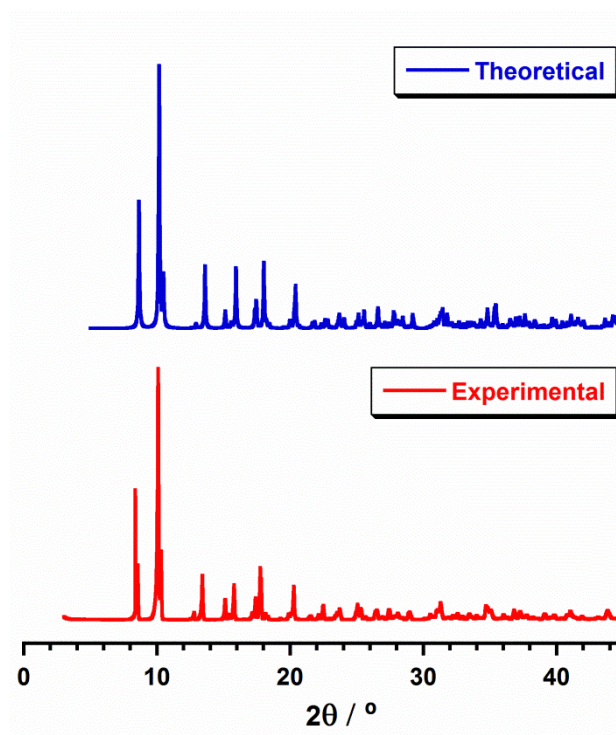

**Figure S1.** Plot of the theoretical and experimental XRD patterns profile ( $2\theta/^\circ$ ) in the range  $0-45^\circ$  for compounds **1** (top) and **2** (bottom).

**Table S1. Summary of the crystal data and structure refinement parameters for 1 and 2.**

| <b>Compound</b>                                | <b>1</b>                                                                                        | <b>2</b>                                                                                        |
|------------------------------------------------|-------------------------------------------------------------------------------------------------|-------------------------------------------------------------------------------------------------|
| CCDC                                           | 2112864                                                                                         | 2112865                                                                                         |
| Formula                                        | C <sub>34</sub> H <sub>41</sub> Cl <sub>7</sub> F <sub>2</sub> N <sub>6</sub> O <sub>7</sub> Re | C <sub>34</sub> H <sub>38</sub> Br <sub>6</sub> F <sub>2</sub> N <sub>6</sub> O <sub>6</sub> Re |
| $M_r$ /g mol <sup>-1</sup>                     | 1118.08                                                                                         | 1330.36                                                                                         |
| Crystal system                                 | Monoclinic                                                                                      | Orthorhombic                                                                                    |
| Space group                                    | <i>P2<sub>1</sub>/c</i>                                                                         | <i>Pbca</i>                                                                                     |
| $a/\text{Å}$                                   | 15.357(1)                                                                                       | 16.864(1)                                                                                       |
| $b/\text{Å}$                                   | 20.431(1)                                                                                       | 11.704(1)                                                                                       |
| $c/\text{Å}$                                   | 13.482(1)                                                                                       | 20.444(1)                                                                                       |
| $\alpha/^\circ$                                | 90                                                                                              | 90                                                                                              |
| $\beta/^\circ$                                 | 112.67(1)                                                                                       | 90                                                                                              |
| $\gamma/^\circ$                                | 90                                                                                              | 90                                                                                              |
| $V / \text{Å}^3$                               | 3903.1(3)                                                                                       | 4035.3(2)                                                                                       |
| $Z$                                            | 4                                                                                               | 4                                                                                               |
| $D_c/\text{g cm}^{-3}$                         | 1.903                                                                                           | 2.190                                                                                           |
| $\mu(\text{Mo-K}\alpha)/\text{mm}^{-1}$        | 3.660                                                                                           | 9.013                                                                                           |
| $F(000)$                                       | 2220                                                                                            | 2540                                                                                            |
| Goodness-of-fit on $F^2$                       | 1.095                                                                                           | 1.050                                                                                           |
| $R_1 [I > 2\sigma(I)] / (\text{all data})$     | 0.0127 / 0.0139                                                                                 | 0.0192 / 0.0329                                                                                 |
| $wR_2 [I > 2\sigma(I)] / (\text{all data})$    | 0.0360 / 0.0371                                                                                 | 0.0280 / 0.0354                                                                                 |
| $\Delta\rho$ peak and hole / e.Å <sup>-3</sup> | 0.493 and -0.808                                                                                | 0.441 and -0.387                                                                                |

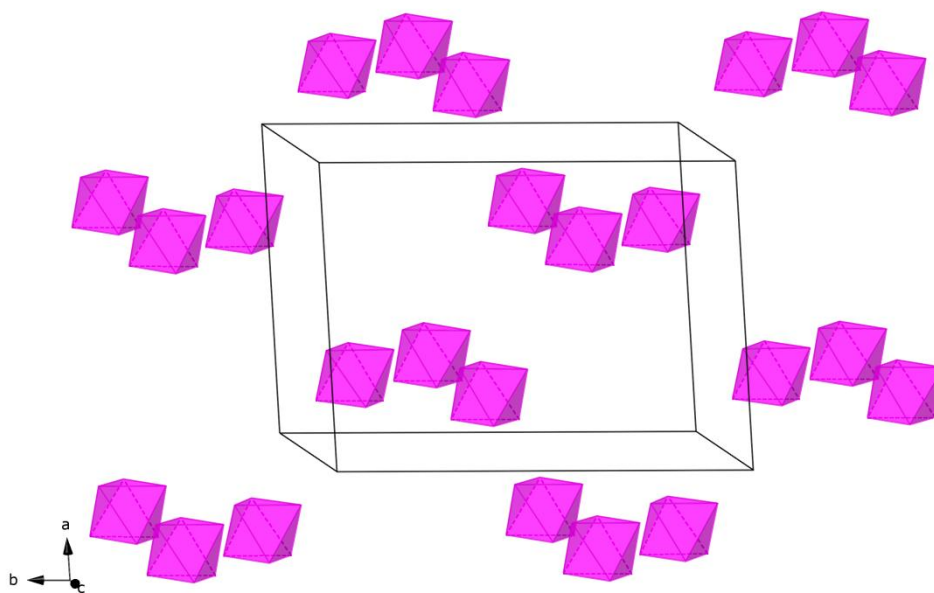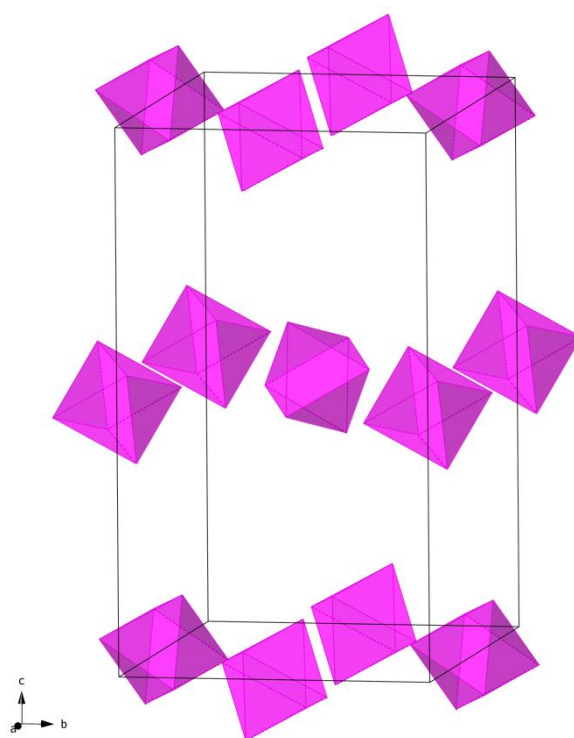

**Figure S2.** Perspective view of the arrangement of adjacent  $[\text{ReX}_6]^{2-}$  [ $\text{X} = \text{Cl}$ (**1**) and  $\text{Br}$ (**2**)] anions (pink polyhedra) in the crystal of **1** (top) and **2** (bottom). Crystallization water molecules and  $\text{Cl}^-$  anions (**1**) and protonated organic cations (**1** and **2**) have been omitted for clarity.

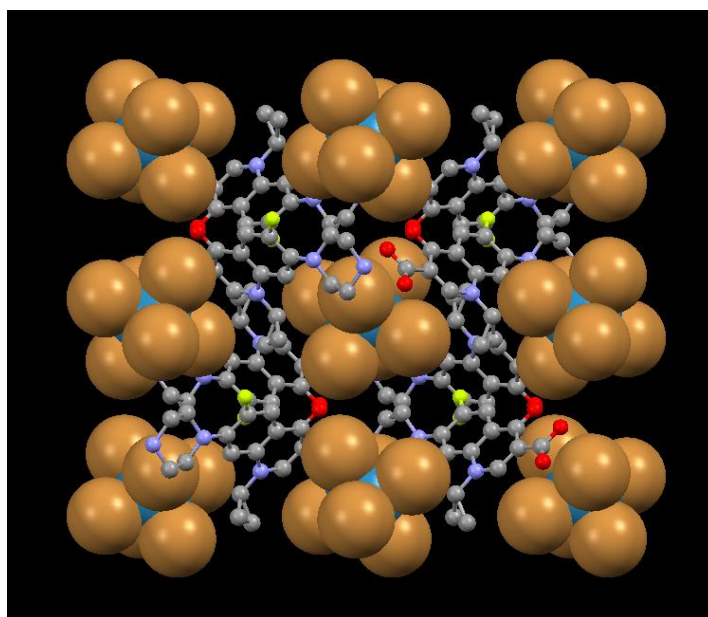

**Figure S3.** Perspective view along the *b*-axis direction of the packing between [Hcip]<sup>+</sup> cations (ball-and-stick model) and [ReBr<sub>6</sub>]<sup>2-</sup> anions (space-filling model) in the crystal of **2**.

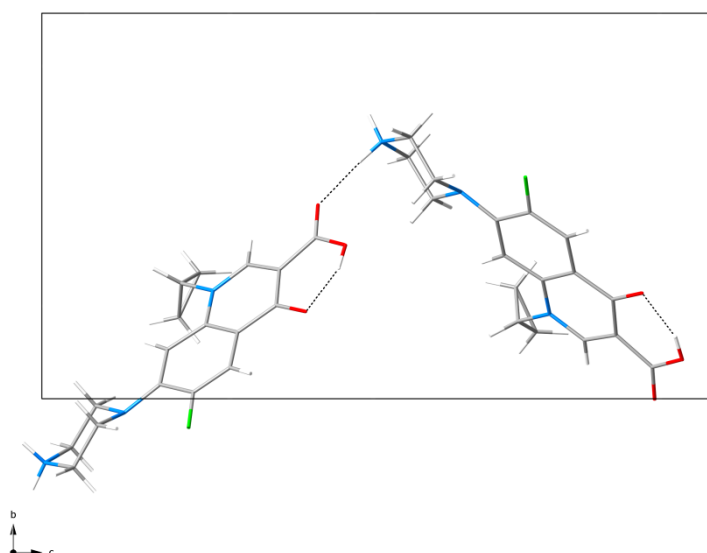

**Figure S4.** Detail of the H-bonding interaction between neighboring -COOH and -NH<sub>2</sub> groups connecting the [Hcip]<sup>+</sup> cations in the crystal structure of **2** [O(1)⋯N(3e) distance of *ca.* 2.85(1) Å; (e) = *x*, 1/2-*y*, -1/2+*z*].

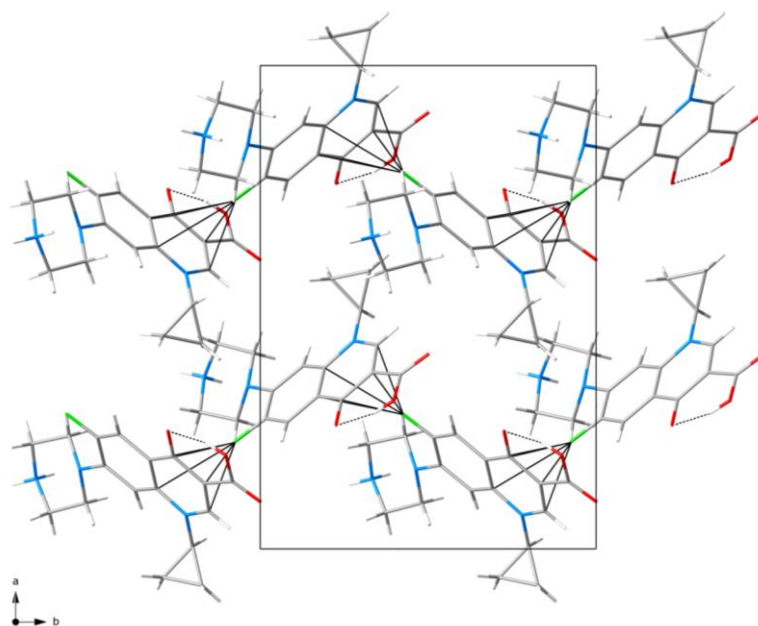

**Figure S5.** View along the  $c$ -axis direction of the intermolecular  $\pi \cdots \text{F}$  type interactions (solid lines) involving quinoline rings and fluorine atoms of adjacent  $[\text{Hcip}]^+$  cations in the crystal structure of **2** [the shortest centroid  $\cdots$  fluorine distance being approximately 2.95(1) Å; (f) =  $-x+1/2, y+1/2, z$ ].

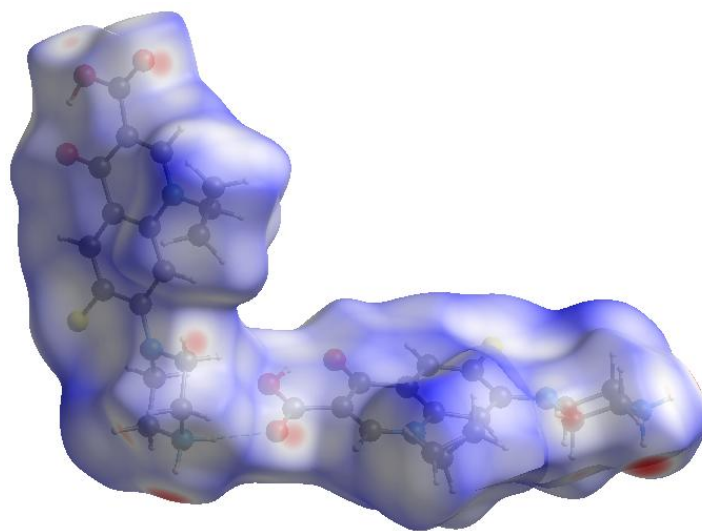

**Figure S6.** Hirshfeld surface mapped with  $d_{\text{norm}}$  function for two  $[\text{Hcip}]^+$  cations interacting through  $-\text{COOH}$  and  $-\text{NH}_2$  groups in compound **2**.

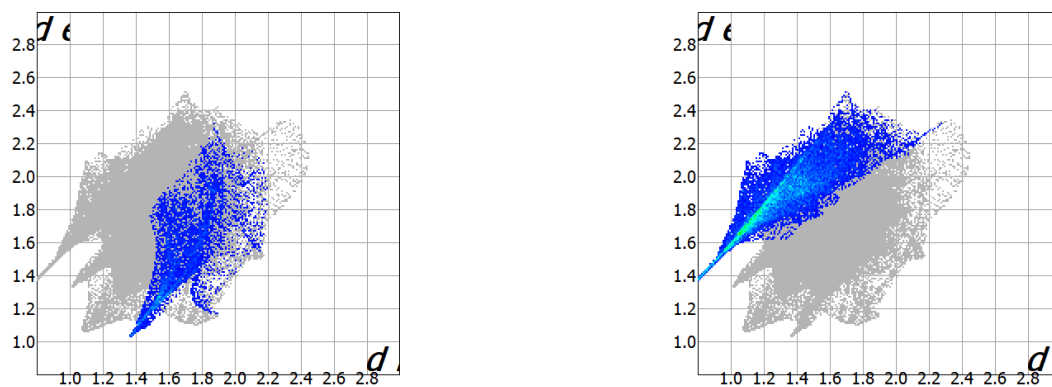

**Figure S7.** Intermolecular O...H (left) and Cl...H (right) interactions highlighted from the full fingerprint of the Hirshfeld surface of compound **1**.

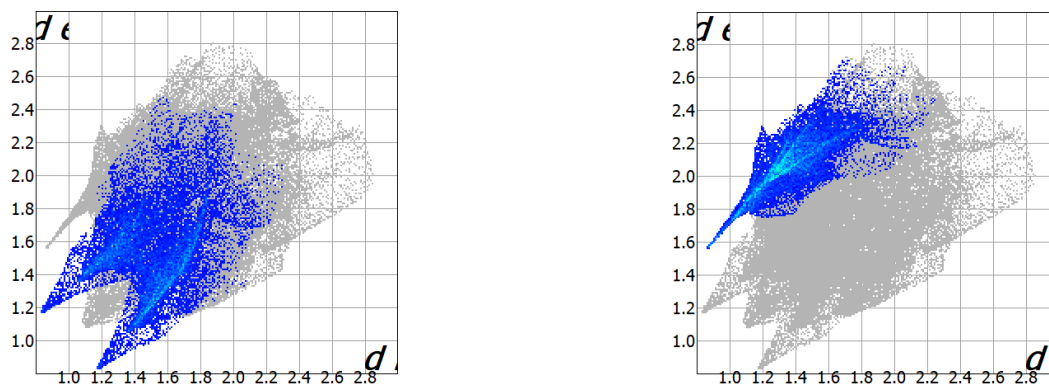

**Figure S8.** Intermolecular O...H (left) and Br...H (right) interactions highlighted from the full fingerprint of the Hirshfeld surface of compound **2**.



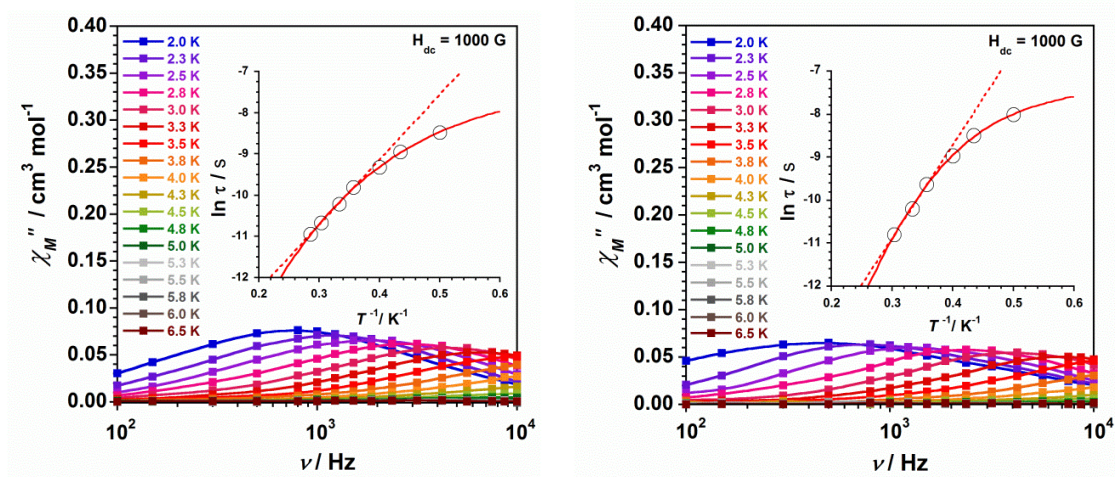

**Figure S9.** Frequency dependence of the out-of-phase ac susceptibility signals under a dc field of 1000 G for **1** (left) and **2** (right). The inset shows the  $\ln(\tau)$  versus  $1/T$  plot with the fit to the Arrhenius law (dashed line) and the fit considering the contribution of two mechanisms (direct + Raman).



**Table S2. Energy barrier ( $U_{eff}$ ) and preexponential factor ( $\tau_0$ ) values obtained through the dc applied magnetic fields of 1000 and 5000 G and the Arrhenius law for 1 and 2.**

| <b>Compound</b> | <b><math>H_{dc} / G</math></b> | <b><math>U_{eff} / K</math></b> | <b><math>\tau_0 / s</math></b> |
|-----------------|--------------------------------|---------------------------------|--------------------------------|
| <b>1</b>        | 1000                           | 15.8                            | $1.94 \times 10^{-7}$          |
|                 | 5000                           | 15.0                            | $3.41 \times 10^{-7}$          |
| <b>2</b>        | 1000                           | 19.7                            | $2.80 \times 10^{-8}$          |
|                 | 5000                           | 17.3                            | $1.62 \times 10^{-7}$          |

**Table S3. Parameters of the magnetic relaxation obtained through dc applied magnetic fields of 1000 and 5000 G and considering Direct and Raman processes for 1 and 2.**

| <b>Compound</b> | <b><math>H_{dc} / G</math></b> | <b><math>A / s^{-1}K^1</math></b> | <b><math>C / s^{-1}K^n</math></b> | <b>n</b> |
|-----------------|--------------------------------|-----------------------------------|-----------------------------------|----------|
| <b>1</b>        | 1000                           | 1242.4                            | 45.5                              | 5.6      |
|                 | 5000                           | 2536.4                            | 11.2                              | 6.3      |
| <b>2</b>        | 1000                           | 1065.6                            | 3.2                               | 8.0      |
|                 | 5000                           | 2152.0                            | 2.9                               | 7.6      |

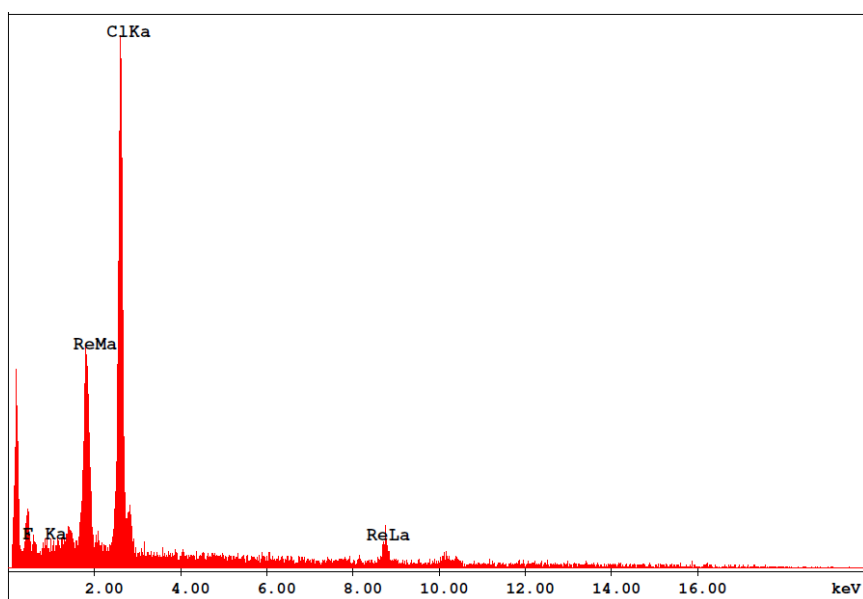

**Figure S10.** SEM-EDX spectrum for compound 1.

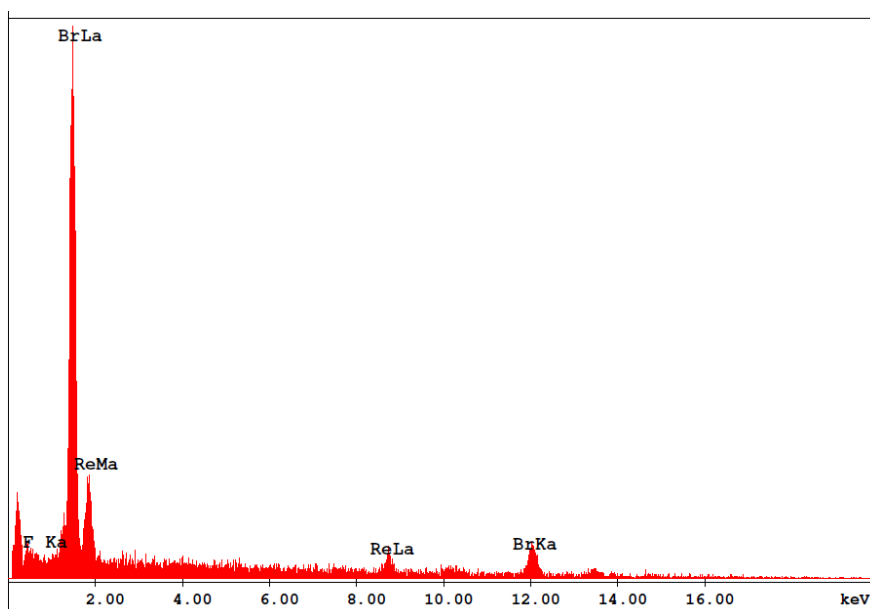

**Figure S11.** SEM-EDX spectrum for compound 2.
